# Supplementary material
Source: publisher figshare collection journal article supplement (https://aacr.figshare.com/articles/dataset/_/23627194)
Supplement: Supplementary file 1 [file 41457913]

## Supplementary Materials and Methods

### *Search Strategies*

#### **MEDLINE**

1. (estrogen or oestrogen or androgen or testosterone or prolactin or progestin or DHEA or DHEAS or dehydroepiandrosterone or follicle stimulating hormone or FSH or luteinizing hormone or LH or luteinising hormone or progesterone or estradiol or oestradiol or androstenedione or sex hormone binding globulin or SHBG or sex hormone\* or steroid hormone\* or estrone or oestrone or dihydrotestosterone or DHT or androstenediol).ab. or Gonadal Steroid Hormones.sh.
2. (esophagus or oesophagus or esophageal or oesophageal or gastric or stomach or cardia or liver or hepatocellular or colon or colorectal or rectal or rectum or intestinal or bowel or intestine or gut or pancreas or pancreatic or digestive or gastrointestinal or aerodigestive).ab.
3. (cancer or carcinoma or adenocarcinoma or tumor or tumour or malignan\* or neoplas\*).ab. or Neoplasms.sh.
4. #2 and #3
5. (Esophageal Neoplasms or Stomach Neoplasms or Liver Neoplasms or Colorectal Neoplasms or Pancreatic Neoplasms or Colonic Neoplasms or Rectal Neoplasms or Gastrointestinal Neoplasms).sh.
6. #4 or #5
7. #1 and #6

#### **Embase**

1. estrogen:ab,ti OR oestrogen:ab,ti OR androgen:ab,ti OR testosterone:ab,ti OR prolactin:ab,ti OR progestin:ab,ti OR dheaa:ab,ti OR dheas:ab,ti OR dehydroepiandrosterone:ab,ti OR 'follicle stimulating hormone':ab,ti OR fsh:ab,ti OR 'luteinizing hormone':ab,ti OR lh:ab,ti OR 'luteinising hormone':ab,ti OR progesterone:ab,ti OR estradiol:ab,ti OR oestradiol:ab,ti OR androstenedione:ab,ti OR 'sex hormone binding globulin':ab,ti OR shbg:ab,ti OR 'sex hormone\*':ab,ti OR 'steroid hormone\*':ab,ti OR estrone:ab,ti OR oestrone:ab,ti OR dihydrotestosterone:ab,ti OR dht:ab,ti OR androstenediol:ab,ti
2. esophagus:ab,ti OR oesophagus:ab,ti OR esophageal:ab,ti OR oesophageal:ab,ti OR gastric:ab,ti OR stomach:ab,ti OR cardia:ab,ti OR liver:ab,ti OR hepatocellular:ab,ti OR colon:ab,ti OR colorectal:ab,ti OR rectal:ab,ti OR rectum:ab,ti OR intestinal:ab,ti OR bowel:ab,ti OR intestine:ab,ti OR gut:ab,ti OR pancreas:ab,ti OR pancreatic:ab,ti OR digestive:ab,ti OR gastrointestinal:ab,ti OR aerodigestive:ab,ti
3. cancer:ab,ti OR carcinoma:ab,ti OR adenocarcinoma:ab,ti OR tumor:ab,ti OR tumour:ab,ti OR malignan\*:ab,ti OR neoplas\*:ab,ti
4. #1 AND #2 AND #3
